# Supplementary material for: Ultraviolet irradiation-mediated formation of Aβ42oligomers and reactive oxygen species in Zn2+-bound Aβ42aggregates irrespective of the removal of Zn2+
Source: Royal Society of Chemistry journal article supplement (doi:10.1039/c6nj02004f), 2016-01-01

## Supporting information

### Ultraviolet irradiation-mediated formation of A $\beta$ <sub>42</sub> oligomers and reactive oxygen species in Zn<sup>2+</sup>-bound A $\beta$ <sub>42</sub> aggregates irrespective removal of Zn<sup>2+</sup>

Xiang Li<sup>a</sup>, Xiongwei Dong<sup>a</sup>, Yaojing Liu<sup>a</sup>, Yan Meng<sup>a</sup>, Yong Zhang<sup>b</sup>, Dan Zhang<sup>a</sup>, Changlin Liu<sup>\*a</sup>

<sup>a</sup>Key Laboratory of Pesticide & Chemical Biology, Ministry of Education, and School of Chemistry, Central China Normal University, Wuhan 430079, Hubei, People's Republic of China;

<sup>b</sup>School of Chemical and Materials Engineering, Hubei Polytechnic University, Huangshi 435003, Hubei, People's Republic of China;

\* Correspondence: liuchl@mail.ccnu.edu.cn

| Table of contents                | page |
|----------------------------------|------|
| Supporting information Table S1  | S2   |
| Supporting information Table S2  | S3   |
| Supporting information Figure S1 | S4   |
| Supporting information Figure S2 | S5   |

**Supporting information Table S1.** Crystal data and structure refinement for [Zn(FC-11)(H<sub>2</sub>O)<sub>2</sub>]Cl<sub>2</sub>.

|                                         |                                                                     |                 |
|-----------------------------------------|---------------------------------------------------------------------|-----------------|
| <b>Empirical formula</b>                | C <sub>27</sub> H <sub>27</sub> N <sub>7</sub> O <sub>10</sub> S Zn |                 |
| <b>Formula weight</b>                   | 706.99                                                              |                 |
| <b>Temperature</b>                      | 298(2) K                                                            |                 |
| <b>Wavelength</b>                       | 0.71073 Å                                                           |                 |
| <b>Crystal system</b>                   | Monoclinic                                                          |                 |
| <b>Space group</b>                      | C2c                                                                 |                 |
| <b>Unit cell dimensions</b>             | a = 35.144(7) Å                                                     | α = 90°         |
|                                         | b = 10.1699(17) Å                                                   | β = 148.402(8)° |
|                                         | c = 33.644(6) Å                                                     | γ = 90°         |
| <b>Volume</b>                           | 6300(2) Å <sup>3</sup>                                              |                 |
| <b>Z</b>                                | 8                                                                   |                 |
| <b>Density (calculated)</b>             | 1.491 Mg/m <sup>3</sup>                                             |                 |
| <b>Absorption coefficient</b>           | 0.912 mm <sup>-1</sup>                                              |                 |
| <b>F(000)</b>                           | 2912                                                                |                 |
| <b>Crystal size</b>                     | 0.16 x 0.12 x 0.11 mm <sup>3</sup>                                  |                 |
| <b>Theta range for data collection</b>  | 2.10 to 25.50°.                                                     |                 |
| <b>Index ranges</b>                     | -42 ≤ h ≤ 42, -12 ≤ k ≤ 12,<br>-40 ≤ l ≤ 38                         |                 |
| <b>Reflections collected</b>            | 18165                                                               |                 |
| <b>Independent reflections</b>          | 5856 [R(int) = 0.0471]                                              |                 |
| <b>Completeness to theta = 25.50°</b>   | 99.8 %                                                              |                 |
| <b>Absorption correction</b>            | None                                                                |                 |
| <b>Max. and min. transmission</b>       | 0.9063 and 0.8678                                                   |                 |
| <b>Refinement method</b>                | Full-matrix least-squares on F <sup>2</sup>                         |                 |
| <b>Data / restraints / parameters</b>   | 5856 / 108 / 426                                                    |                 |
| <b>Goodness-of-fit on F<sup>2</sup></b> | 1.118                                                               |                 |
| <b>Final R indices [I &gt; 2σ(I)]</b>   | R1 = 0.0838, wR2 = 0.2188                                           |                 |
| <b>R indices (all data)</b>             | R1 = 0.0940, wR2 = 0.2262                                           |                 |

**Supporting information Table S2.** The major data of bond lengths (Å) and angles (°) for [Zn(FC-11)(H<sub>2</sub>O)<sub>2</sub>]Cl<sub>2</sub>.

---

|                 |            |
|-----------------|------------|
| Zn(1)-O(2)      | 2.018(4)   |
| Zn(1)-N(2)      | 2.086(3)   |
| Zn(1)-N(3)      | 2.096(3)   |
| Zn(1)-O(3)      | 2.122(4)   |
| Zn(1)-O(1)      | 2.189(4)   |
| Zn(1)-N(1)      | 2.243(5)   |
| <hr/>           |            |
| O(2)-Zn(1)-N(2) | 101.96(18) |
| O(2)-Zn(1)-N(3) | 101.44(17) |
| N(2)-Zn(1)-N(3) | 156.59(14) |
| O(2)-Zn(1)-O(3) | 100.10(19) |
| N(2)-Zn(1)-O(3) | 86.71(17)  |
| N(3)-Zn(1)-O(3) | 89.60(18)  |
| O(2)-Zn(1)-O(1) | 85.84(16)  |
| N(2)-Zn(1)-O(1) | 83.58(16)  |
| N(3)-Zn(1)-O(1) | 97.75(16)  |
| O(3)-Zn(1)-O(1) | 169.51(17) |
| O(2)-Zn(1)-N(1) | 162.92(17) |
| N(2)-Zn(1)-N(1) | 79.12(17)  |
| N(3)-Zn(1)-N(1) | 78.41(17)  |
| O(3)-Zn(1)-N(1) | 96.98(18)  |
| O(1)-Zn(1)-N(1) | 77.31(15)  |

---

**Supporting information Figure S1: Potentiometric titration of FC-11 with  $\text{Zn}(\text{NO}_3)_2$ .** (a) Potentiometric titration curve of the solutions containing **FC-11** and equimolar amount  $\text{Zn}(\text{NO}_3)_2$  at 25°C. (b) Species distribution plot in the  $\text{Zn}^{2+}$ -**FC-11** system.

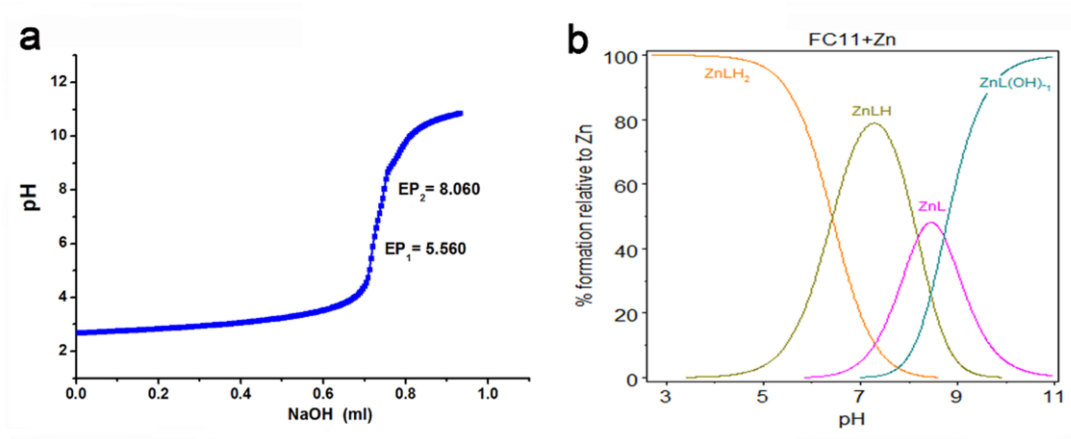

**Supporting information Figure S2: Fluorescence titration of FC-11 with a Zn<sup>2+</sup> solution. (a)**

Fluorescence spectra of **FC-11** at varied ratios of Zn<sup>2+</sup>/FC-11 in pH 7.4 buffer at room temperature.

**(b)** Job plotting using the data of fluorescence titration with the Zn<sup>2+</sup> solution.

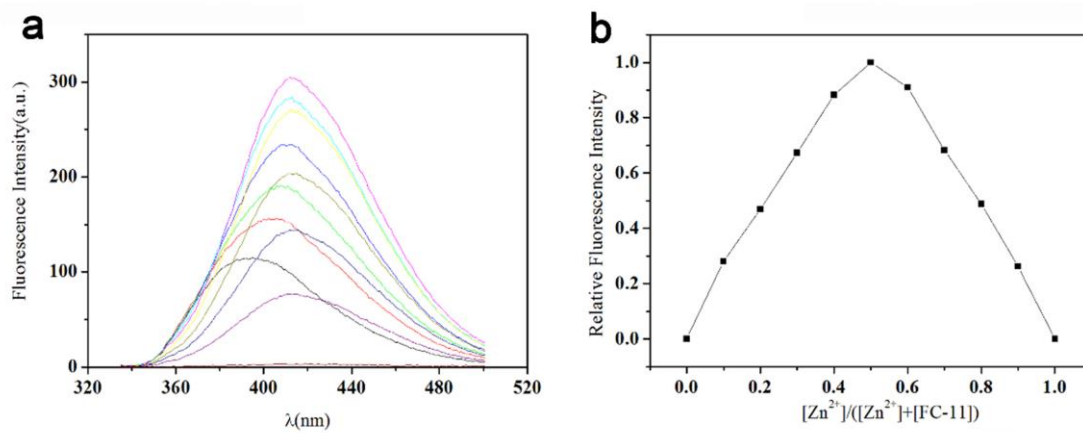

Supplement: c6nj02004f1.pdf [file c6nj02004f1.pdf]
